# Supplementary material for: Dual Epigenetic and Chaperone Inhibition Disrupts Hypoxia Signaling and Tumor Progression in 3-D Models of Triple-Negative Breast Cancer
Source: Research Square preprint supplement (doi:10.21203/rs.3.rs-10319464/v1), 2026-07-20
Supplement: Supplementary file 1 [file 3ae4cae5b52598b8bc0e050f.docx]

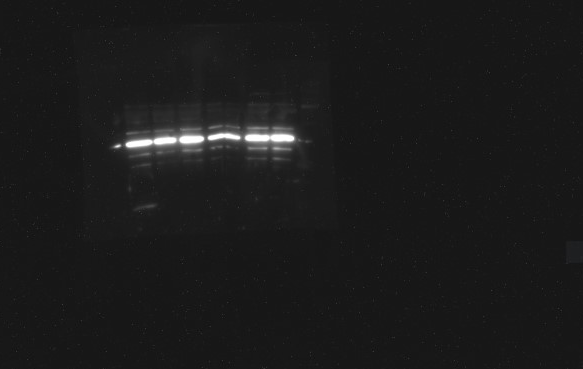

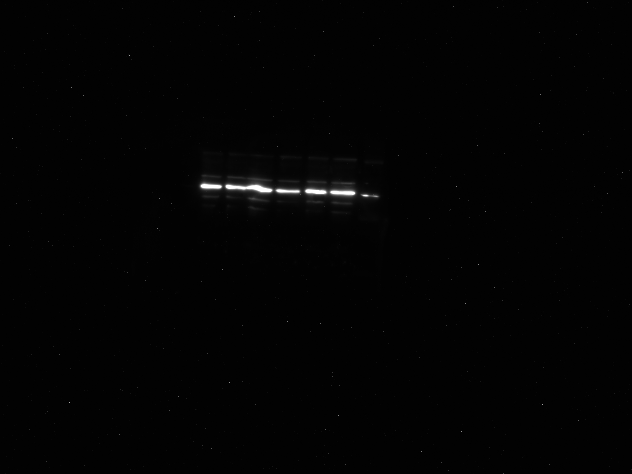


MDA-MB-231 HIF1a Normoxia

MDA-MB-231 HIF1a Hypoxia


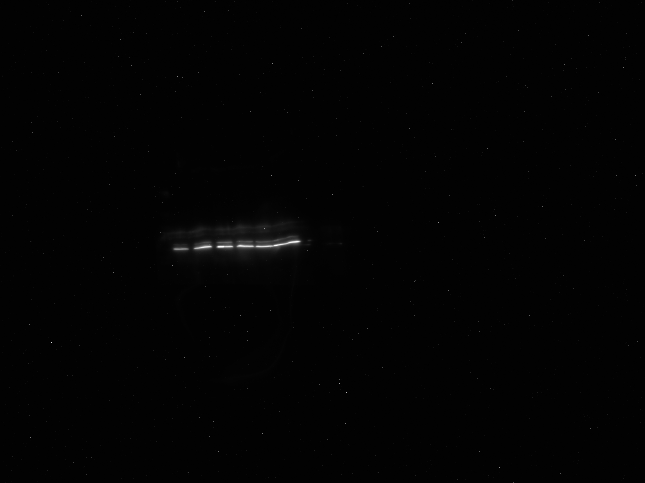


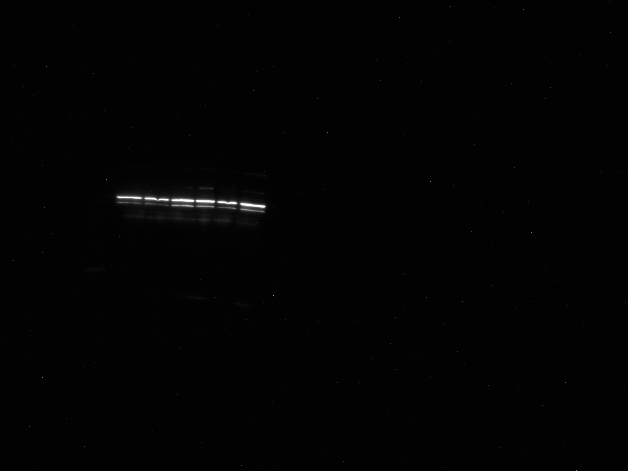


MDA-MB-231 HIF2a and HSP90 Normoxia

MDA-MB-231 HIF2a and HSP90 Hypoxia


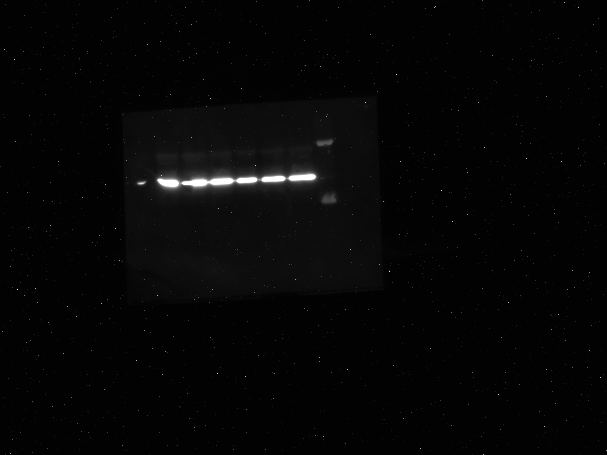

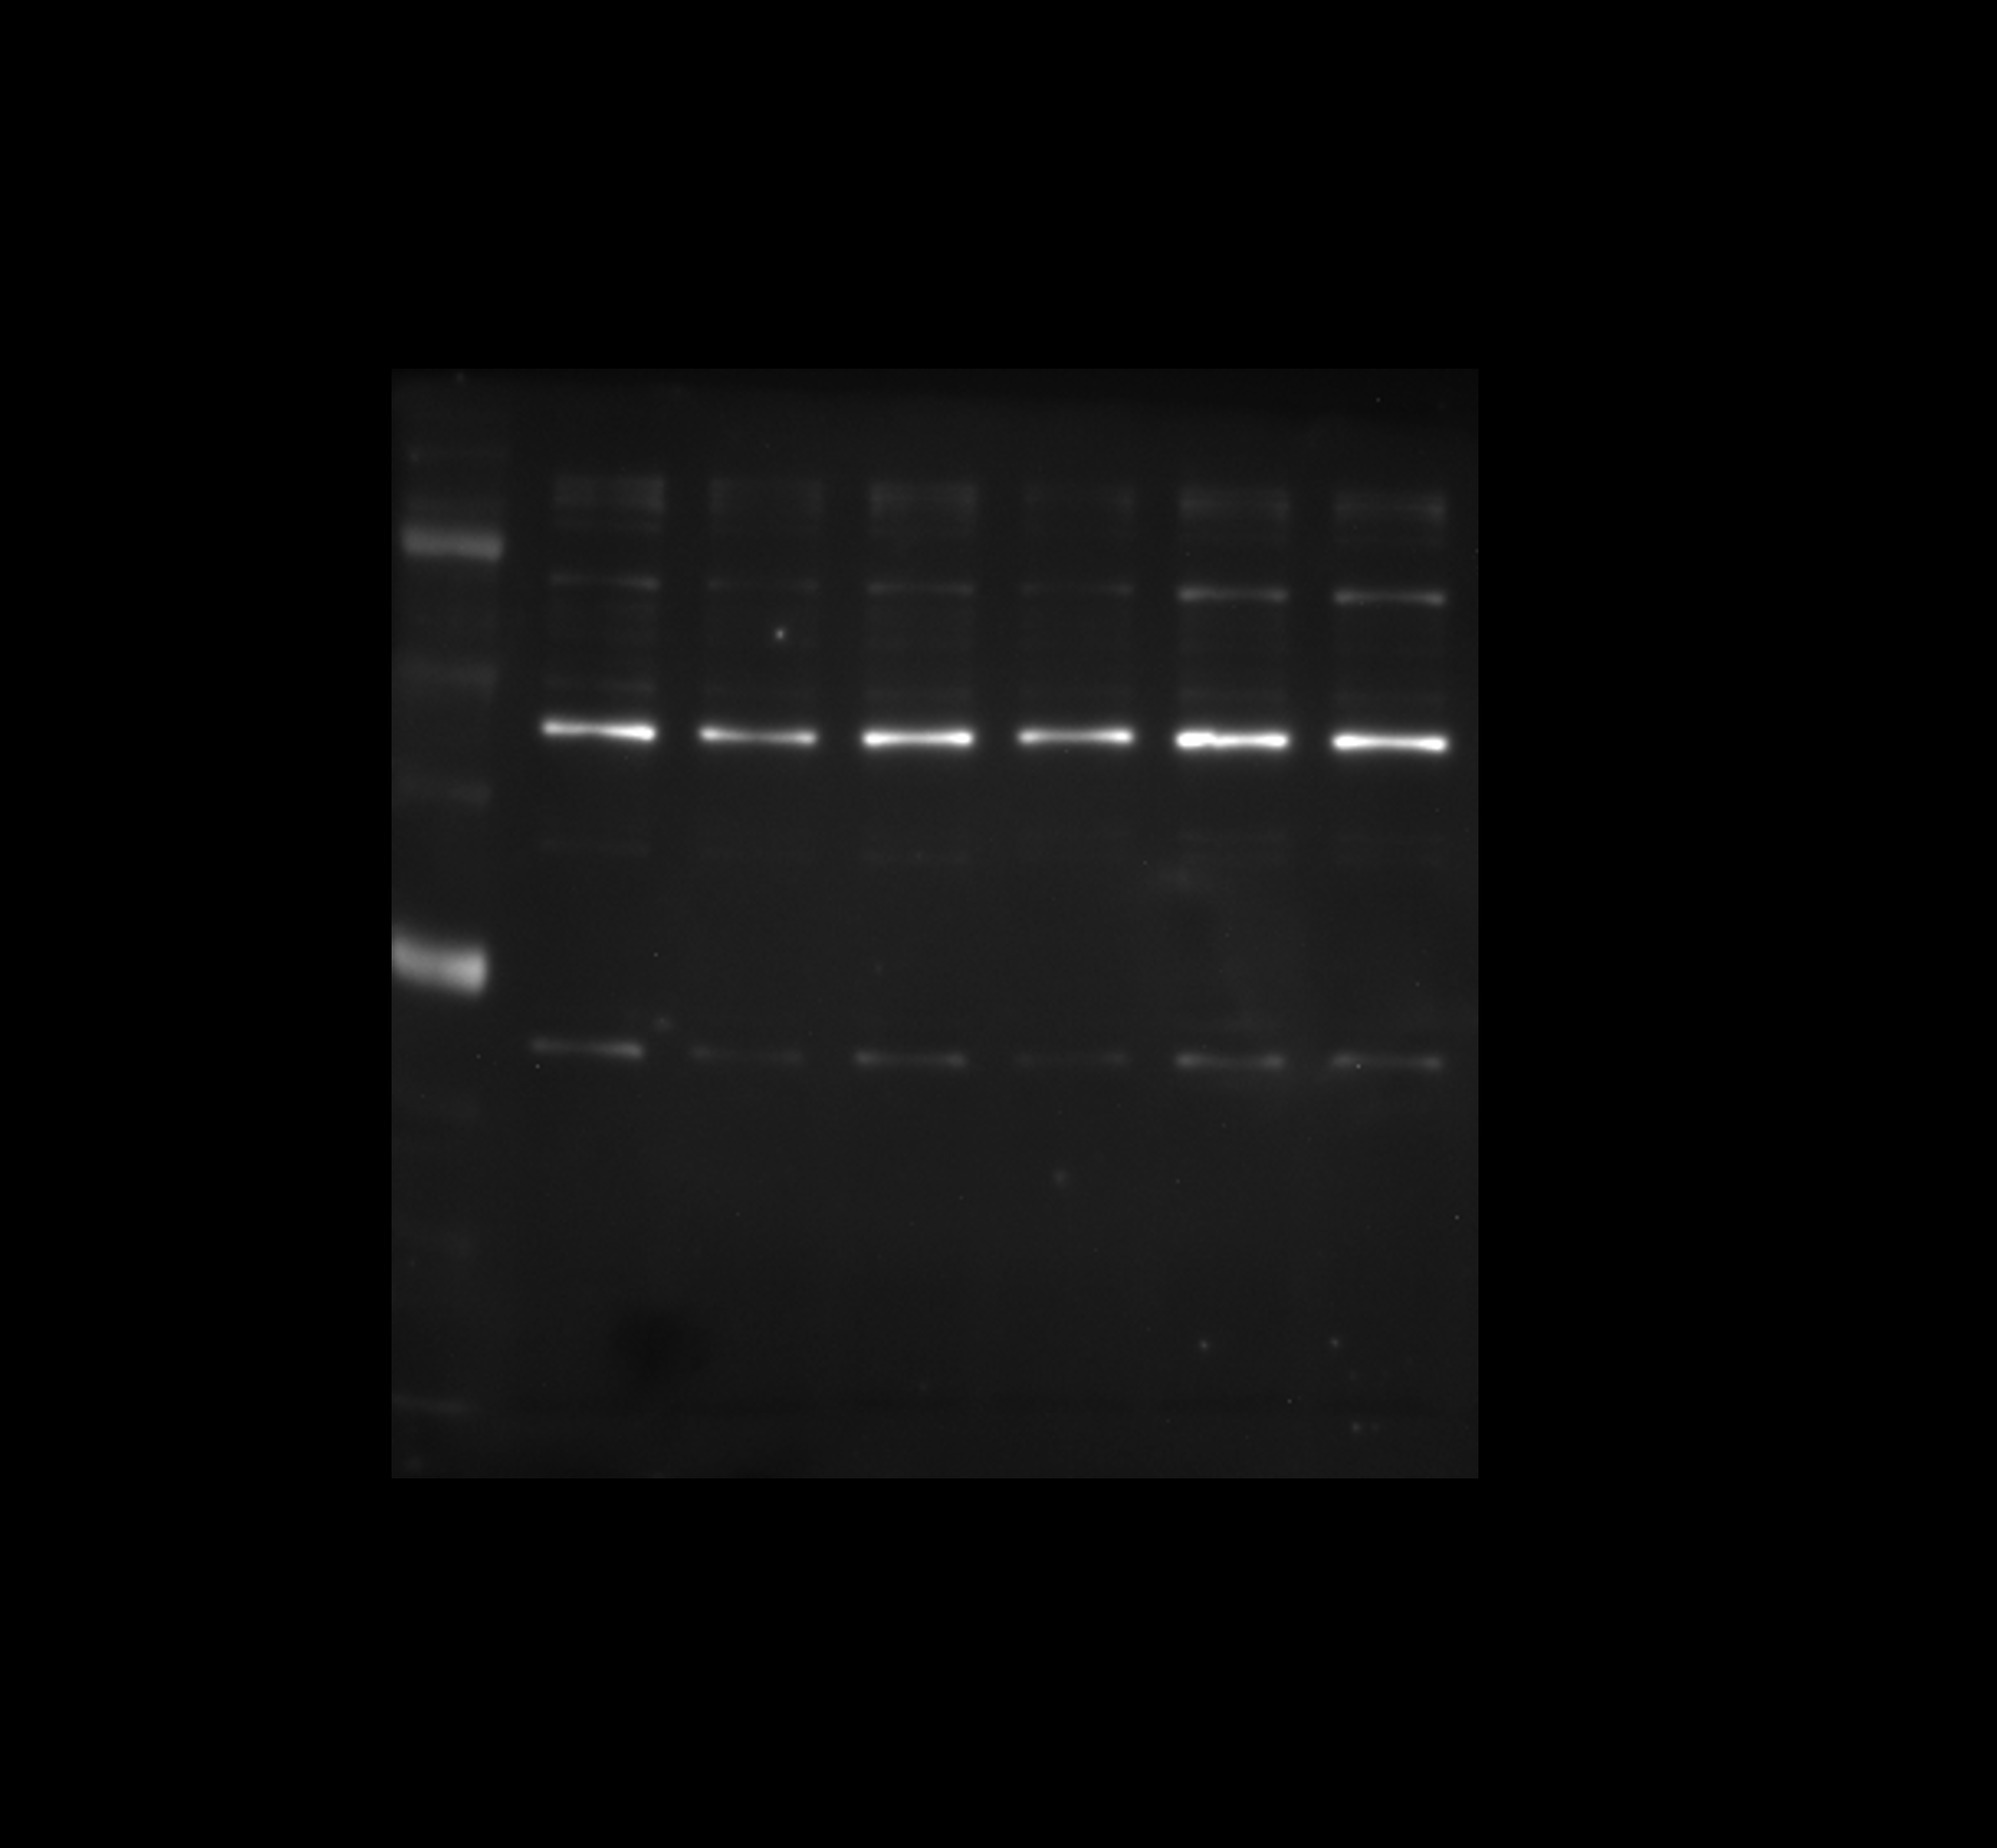


MDA-MB-231 TRAP1 Normoxia

MDA-MB-231 TRAP1 Hypoxia


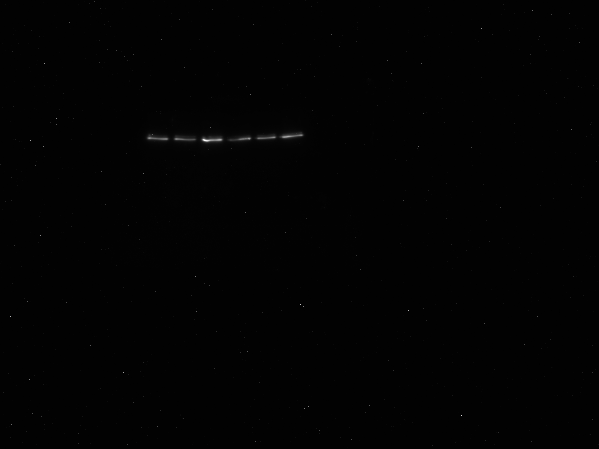

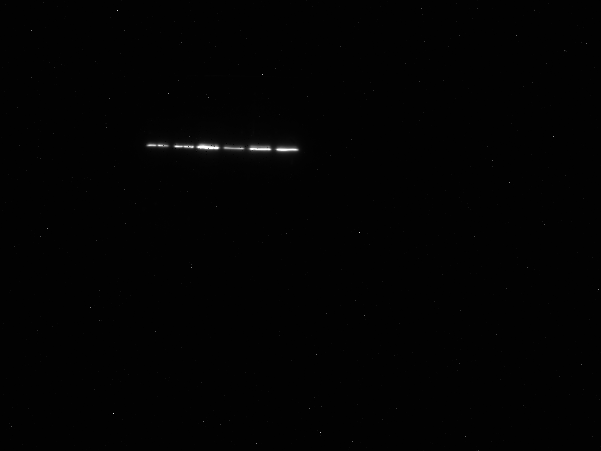


MDA-MB-231 VEGF Normoxia

MDA-MB-231 VEGF Hypoxia


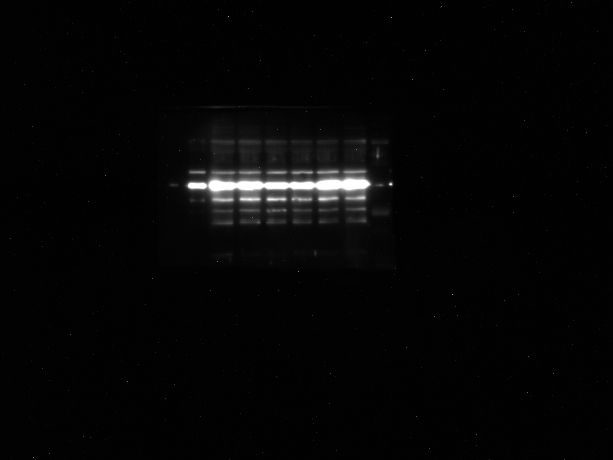

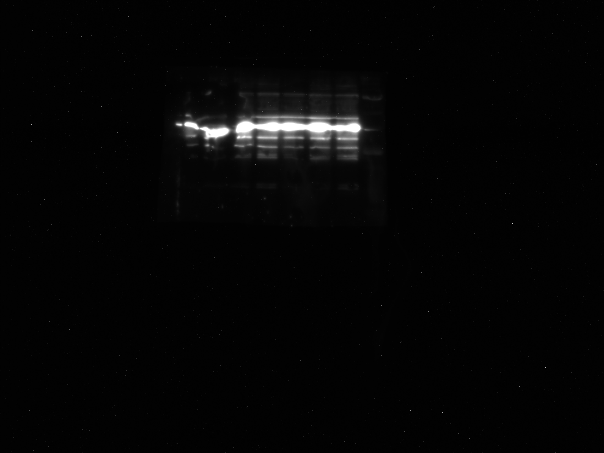


MCF-7 HIF1A Normoxia

MCF-7 HIF1A Hypoxia


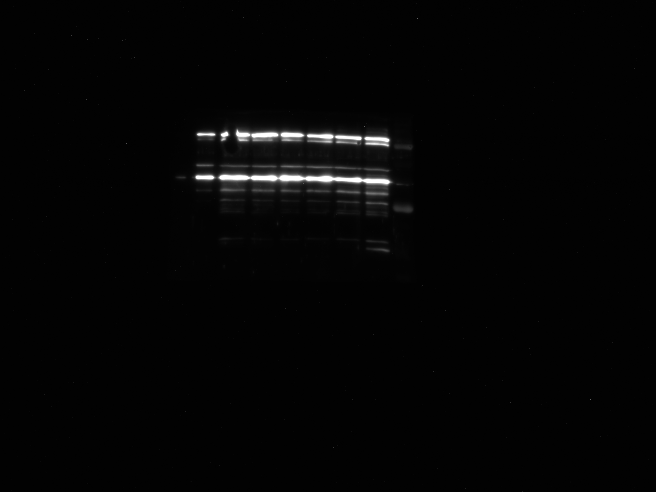


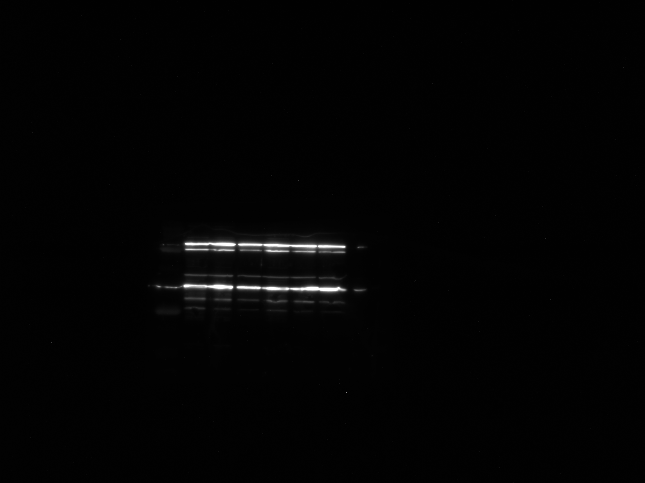


MCF-7 HIF2A and HSP90 normoxia

MCF-7 HIF2A and HSP90 Hypoxia


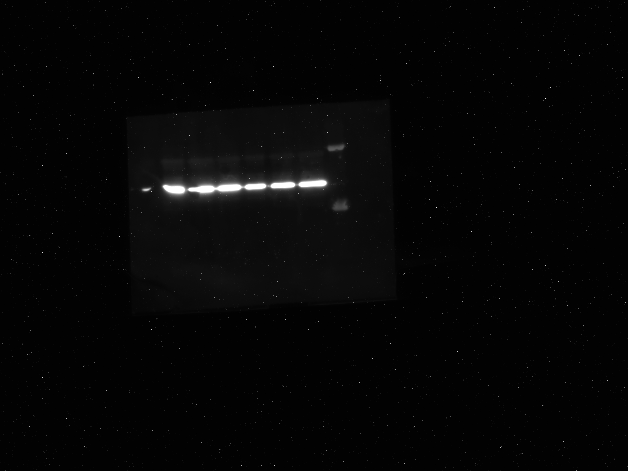

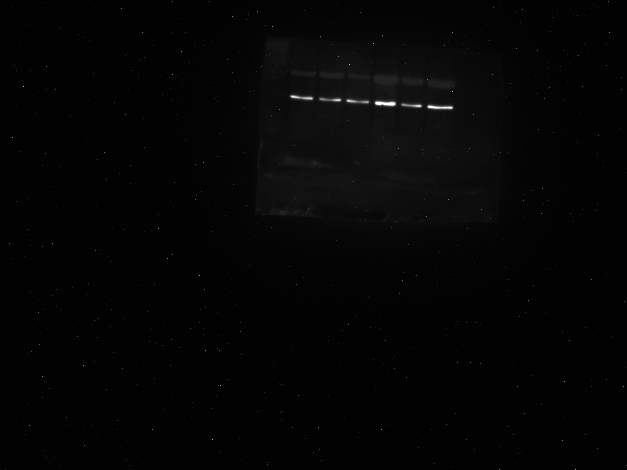


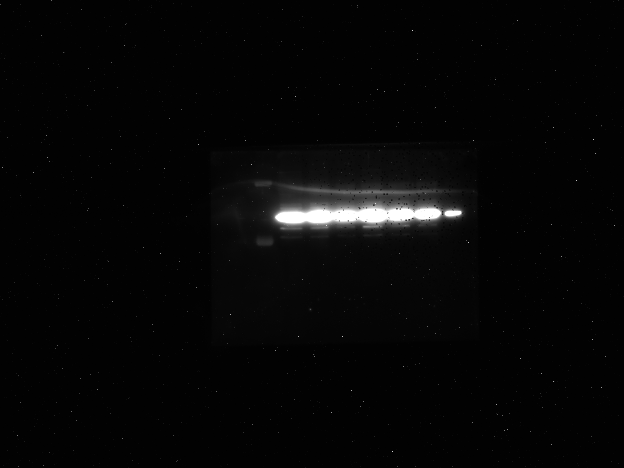


MCF-7 TRAP1 Normoxia

MCF-7 TRAP1 Hypoxia


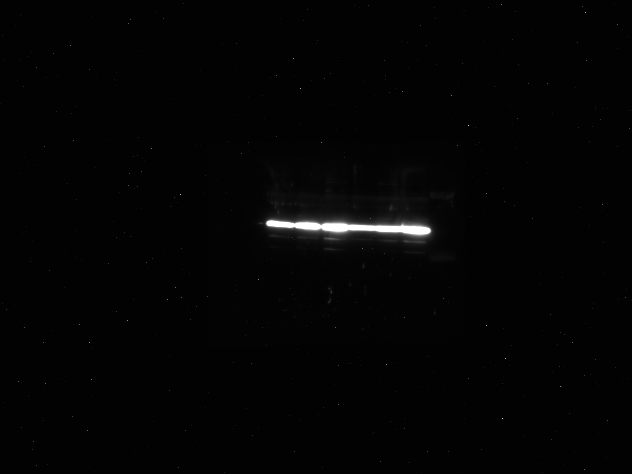


MCF-7 VEGF Normoxia

MCF-7 VEGF Hypoxia
