# Supplementary material for: Dual Epigenetic and Chaperone Inhibition Disrupts Hypoxia Signaling and Tumor Progression in 3-D Models of Triple-Negative Breast Cancer
Source: Research Square preprint supplement (doi:10.21203/rs.3.rs-10319464/v1), 2026-07-20
Supplement: Supplementary file 2 [file 4c2b1990b4e630254f8f7e25.xlsx]

## Sheet: Sheet1
	HDAC class/target		Combination therapy
HDAC inhibitor		TNBC setting		Phase	Key finding/status	Trial ID	Reference
		Metastatic/advanced HER2− breast cancer including TNBC cohorts
			Entinostat + nivolumab + ipilimumab		Immune checkpoint combination; evaluated safety, dose, and immune activation in HER2− disease including TNBC subset
Entinostat	Class I HDACi			Phase I		NCT02453620	-39
(MS-275)
		Metastatic TNBC / BRCA-associated breast cancer	Romidepsin + cisplatin ± nivolumab		Early-phase study showing limited monotherapy activity; explored synergy with DNA-damaging agents and immunotherapy
Romidepsin	Class I HDACi			Phase I		NCT02393794	-40
			Belinostat + ribociclib (CDK4/6 inhibitor)		Preclinical rationale supported CDK/HDAC synergy; early clinical evaluation of cell-cycle + epigenetic targeting
Belinostat	Pan-HDACi	Metastatic TNBC		Phase I		NCT04315233	-41
		TNBC / HER2− breast cancer (neoadjuvant settings)			Increased histone acetylation; limited clinical response but acceptable safety in combination regimens
Vorinostat (SAHA)			Vorinostat + carboplatin + nab-paclitaxel
	Pan-HDACi			Phase I/II		NCT00616967	-42
Tucidinostat (Chidamide)					Improved response signals in epigenetically responsive subgroups; ongoing evaluation in TNBC
	Class I HDACi	Metastatic TNBC	Tucidinostat + capecitabine	Phase II		NCT05390476	-43
Vorinostat (SAHA)		Relapsed/metastatic TNBC	Vorinostat + PARP inhibitor (olaparib)		Preclinical synergy via DNA damage + chromatin remodeling; early clinical translation ongoing
	Pan-HDACi			Phase I		NCT03742245	-44
