# Supplementary material for: Dual Epigenetic and Chaperone Inhibition Disrupts Hypoxia Signaling and Tumor Progression in 3-D Models of Triple-Negative Breast Cancer
Source: Research Square preprint supplement (doi:10.21203/rs.3.rs-10319464/v1), 2026-07-20
Supplement: Supplementary file 3 [file b1be06f90d500875e21906db.xlsx]

## Sheet: Sheet1
Drugs	Concentrations	Cell lines	IC50 (24 hr)	IC50 (48 hr)
		MDA-MB-231	266.9	36.47
PTX	1, 5, 10, 100, 500 nM	MDA-MB468	52.2	9.633
		MCF-7	388.3	99.59
		MDA-MB-231	6.938	3.813
SAHA	0.5, 1, 2, 5, 10 µM	MDA-MB468	3.785	2.198
		MCF-7	3.343	1.778
		MDA-MB-231	4.978	1.979
CAY10603	0.01, 0.1, 1, 5, 10 µM	MDA-MB468	3.27	1.773
		MCF-7	1.998	0.418
		MDA-MB-231	2.025	0.26
VPA	0.25, 0.5 ,1 ,2 ,4 µM	MDA-MB468	2.255	0.676
