# Supplementary material for: Dual Epigenetic and Chaperone Inhibition Disrupts Hypoxia Signaling and Tumor Progression in 3-D Models of Triple-Negative Breast Cancer
Source: Research Square preprint supplement (doi:10.21203/rs.3.rs-10319464/v1), 2026-07-20
Supplement: Supplementary file 4 [file d702ca9ac11cd9f0c6893ef7.xlsx]

## Sheet: Sheet1
Drug Combinations	MDA-MB231	MCF-7	Combinational index (CI), MDA-MB-231	Combinational index (CI), MCF-7
NDNB-25 (HSP90i)	257.5 nM	284.5 nM
NDNB-25+ SAHA (Pan-inhibitor)	60.51 nM	131.2 nM	0.234	0.461
NDNB-25 + CAY10603(HDAC6i)	230.0 nM	109.6 nM	0.893	0.385
NDNB-25 + VPA (HDAC1i)	232.2 nM	222.2 nM	0.866	0.781
NDNT-34 (TRAP1i)	3.460 µM	5.890 µM
NDNT-34 + SAHA (Pan-inhibitor)	1.089 µM	2.446 µM	0.314	0.414
NDNT-34 + CAY10603 (HDAC6i)	2.597 µM	2.203 µM	0.75	0.375
NDNT-34 + VPA (HDAC1i)	2.964 µM	1.920 µM	0.856	0.325
